# Supplementary material for: Klotho-related Molecules Upregulated by Smoking Habit in Apparently Healthy Men: A Cross-sectional Study
Source: PubMed Central journal article supplement (PMC4585559; doi:10.1038/srep14230), 2015-09-18
Supplement: srep14230-s1.pdf [file srep14230-s1.pdf]

**Supplementary Information**

**Klotho-related Molecules Upregulated by Smoking Habit**

**in Apparently Healthy Men:**

**A Cross-sectional Study**

Kaori Nakanishi, Makoto Nishida, Masaya Harada, Tohru Ohama, Noritaka Kawada,

Masaaki Murakami, Toshiki Moriyama, Keiko Yamauchi-Takihara.

**Supplementary Table S1. Correlation between smoking severity and serum levels of fibroblast growth factor (FGF)-21, soluble alpha Klotho ( $\alpha$ Kl), and interleukin (IL)-6**

| Smoker (n = 40)           | FGF-21 |         | $\alpha$ Kl |         | IL-6          |              |
|---------------------------|--------|---------|-------------|---------|---------------|--------------|
|                           | r      | P-value | r           | P-value | r             | P-value      |
| Cigarettes smoked per day | -0.05  | 0.71    | 0.01        | 0.95    | <b>*0.326</b> | <b>0.046</b> |
| Brinkman index            | 0.08   | 0.49    | -0.01       | 0.91    | <b>*0.301</b> | <b>0.038</b> |

\* P<0.05.

FGF-21, fibroblast growth factor-21;  $\alpha$ Kl, soluble alpha-Klotho; IL-6, interleukin-6

We examined the correlation between smoking severity (using the number of cigarette smoked per day and Brinkman index) and serum levels of fibroblast growth factor (FGF)-21, soluble alpha Klotho ( $\alpha$ Kl), and interleukin (IL)-6. Serum levels of IL-6 significantly correlated with smoking severity, however FGF-21 and  $\alpha$ Kl did not show any correlations.

**Supplementary Table S2. Correlation between age and serum levels of soluble****alpha Klotho ( $\alpha$ Kl) in middle-aged group**

|     | All (n = 80) |         | Smoker (n =40) |         | Never-smoker (n =40) |         |
|-----|--------------|---------|----------------|---------|----------------------|---------|
|     | r            | P-value | r              | P-value | r                    | P-value |
| age | -0.05        | 0.55    | 0.02           | 0.90    | -0.09                | 0.45    |

To confirm the age influence on serum levels of soluble alpha Klotho ( $\alpha$ Kl) in the middle-aged subjects ( $46.1 \pm 5.1$  years), we examined the correlation between age and serum levels of  $\alpha$ Kl. There were no correlation between age and  $\alpha$ Kl in the study subjects.

**Supplementary Table S3. Characteristics of the subjects in aged group**

|                          | All<br>(n = 60) | Smoker<br>(n = 36) | Never-smoker<br>(n = 24) | P-value          |
|--------------------------|-----------------|--------------------|--------------------------|------------------|
| Age (years)              | 60.3 ± 1.7      | 60.1 ± 1.7         | 60.4 ± 1.8               | 0.56             |
| BMI (kg/m <sup>2</sup> ) | 23.5 ± 2.2      | 23.7 ± 2.3         | 23.2 ± 2.1               | 0.34             |
| WC (cm)                  | 83.3 ± 6.8      | 84.3 ± 6.9         | 81.7 ± 6.4               | 0.14             |
| SBP (mmHg)               | 126 ± 14        | 126 ± 16           | 126 ± 10                 | 0.98             |
| DBP (mmHg)               | 81 ± 10         | 82 ± 11            | 80 ± 9                   | 0.42             |
| Cr (mg/dl)               | 0.8 ± 0.1       | 0.8 ± 0.1          | 0.8 ± 0.1                | 0.14             |
| UA (mg/dl)               | 5.8 ± 1.1       | 5.9 ± 1.1          | 5.6 ± 1.2                | 0.34             |
| TC (mg/dl)               | 208 ± 30        | 209 ± 30           | 208 ± 29                 | 0.92             |
| TG (mg/dl)               | 125 ± 57        | <b>*138 ± 64</b>   | <b>105 ± 36</b>          | <b>0.02</b>      |
| HDL-C (mg/dl)            | 56 ± 14         | 55 ± 16            | 56 ± 11                  | 0.82             |
| FPG (mg/dl)              | 97 ± 18         | 96 ± 20            | 97 ± 14                  | 0.88             |
| HbA1c (%)                | 5.3 ± 0.5       | 5.2 ± 0.6          | 5.4 ± 0.3                | 0.07             |
| sαKl (pg/ml)             | 497 ± 175       | <b>**590 ± 143</b> | <b>350 ± 107</b>         | <b>&lt;0.001</b> |
| IL-6 (pg/ml)             | 1.6 ± 0.7       | 1.7 ± 0.9          | 1.4 ± 0.5                | 0.117            |

Data are expressed as mean ± SD. \* P<0.05, \*\* P<0.001 versus never-smokers.

BMI, body mass index; WC, waist circumference; SBP, systolic blood pressure; DBP, diastolic blood pressure; UA, uric acid; TC, total cholesterol; TG, triglycerides; HDL-C, high-density lipoprotein-cholesterol; FPG, fasting plasma glucose; sαKl, soluble alpha-Klotho; IL-6, interleukin-6

Serum levels of triglycerides (TG) and soluble alpha Klotho (sαKl) were significantly higher in smokers than in never-smokers (P = 0.02 and P < 0.001).

**Supplementary Table S4. Details of smoking habit in aged smokers**

| Smoker (n = 36)           | n (%)     |
|---------------------------|-----------|
| Cigarettes smoked per day |           |
| 10 - 20 cigarettes        | 30 (83.3) |
| 21 - 30 cigarettes        | 3 (8.3)   |
| 31 - 40 cigarettes        | 3 (8.3)   |
| Duration of smoking       |           |
| 11 - 15 years             | 1 (2.8)   |
| 16 - 20 years             | 4 (11.1)  |
| > 20 years                | 31 (86.1) |

The details of smoking habit in aged smokers are shown in Supplementary Table S4.

**Supplementary Figure S1. Correlation between serum levels of fibroblast growth factor (FGF)-21 and interleukin (IL)-6 and adiponectin (APN)**

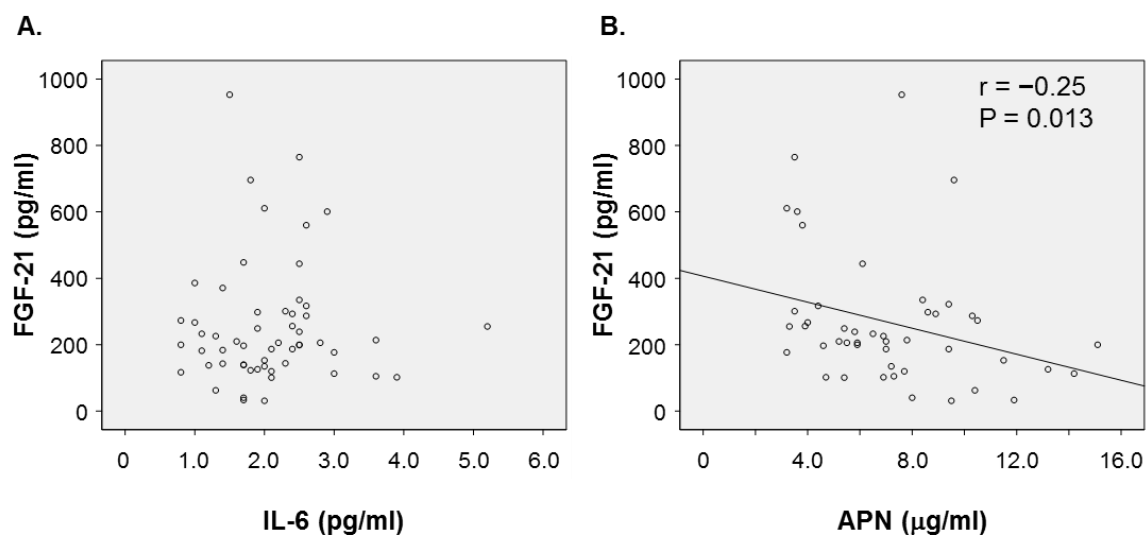

Correlations between serum levels of fibroblast growth factor (FGF)-21 and (A) interleukin (IL)-6 and (B) adiponectin (APN) (n = 80).

Serum levels of FGF-21 were correlated only with APN ( $r = -0.25$ ,  $P = 0.013$ ) and no significant correlation was found between FGF-21 and IL-6.

**Supplementary Figure S2. Comparing the cytokines among middle-aged and aged subjects**

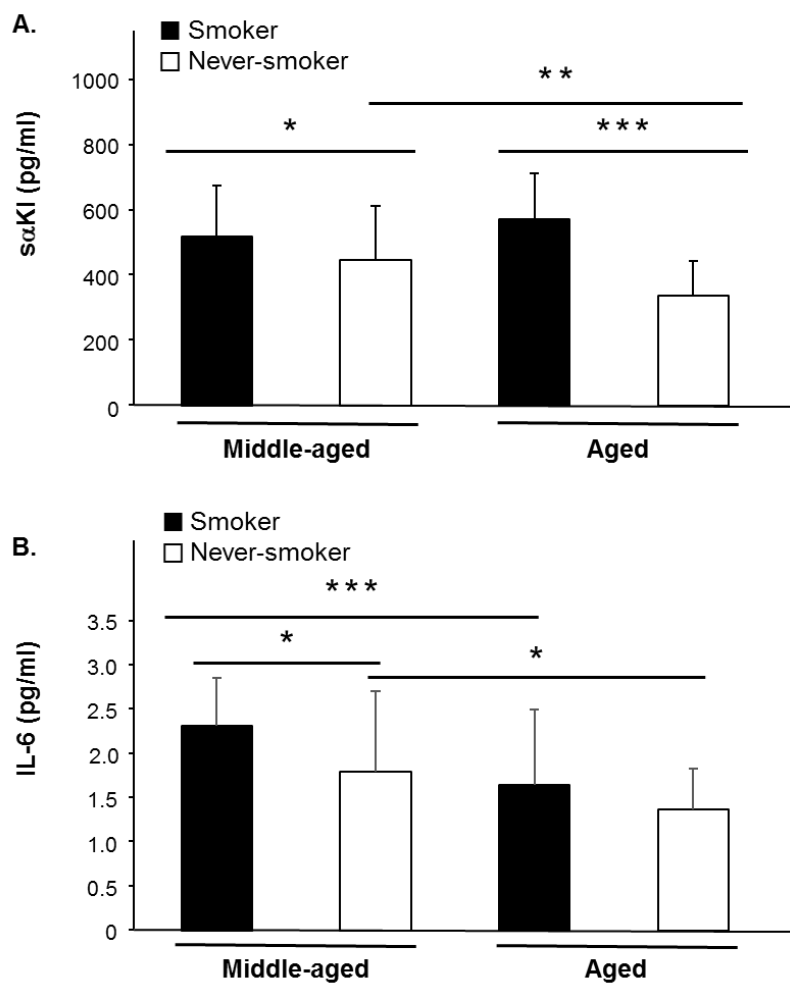

Comparing the serum levels of (A) soluble alpha Klotho (sαKI) and (B) interleukin (IL)-6 among middle-aged (46.1 ± 5.1 years, 40 smokers and 40 never-smokers) and aged (60.3 ± 1.7 years, 36 smokers and 24 never-smokers) subjects.

\*P<0.05, \*\*P<0.005, \*\*\*P<0.001.

In aged never-smokers, serum levels of  $\alpha$ KI and IL-6 were significantly lower to those of middle-aged never-smokers ( $P = 0.002$ ,  $P = 0.035$ ). Moreover, serum levels of IL-6 were significantly lower in aged smokers than in middle-aged smokers ( $P < 0.001$ ).

However, aged smokers showed strongly and significantly increased serum levels of  $\alpha$ KI than aged never-smokers ( $P < 0.001$ ).
